# Supplementary material
Source: HighWire-hosted journal article supplement (https://www.jpn.ca/highwire/filestream/89596/field_highwire_adjunct_files/0/jpn-150028-1-at.pdf)
Supplement: jpn-150028-1-at.pdf [file jpn-150028-1-at.pdf]

**Appendix 1** to Isingrini E, Perret L, Rainer Q, et al. Selective genetic disruption of the dopaminergic, serotonergic and noradrenergic neurotransmission systems: insights on motor, emotional and addictive behaviour. *J Psychiatry Neurosci* 2015.

DOI: 10.1503/jpn.150028

Copyright © 2015 The Author(s) or their employer(s). To receive this resource in an accessible format, please contact us at [cmajgroup@cmaj.ca](mailto:cmajgroup@cmaj.ca).

*Online appendices are unedited and posted as supplied by the authors.*

## **Supplemental Information**

**Figure S1 : Motor functions.**

**Figure S2 : Acute locomotor response to cocaine according to time.**

**Figure S3 : Acute locomotor response to amphetamine according to time.**

**Table S1: Breeding strategy**

**Table S2 : Detailed statistical analysis**

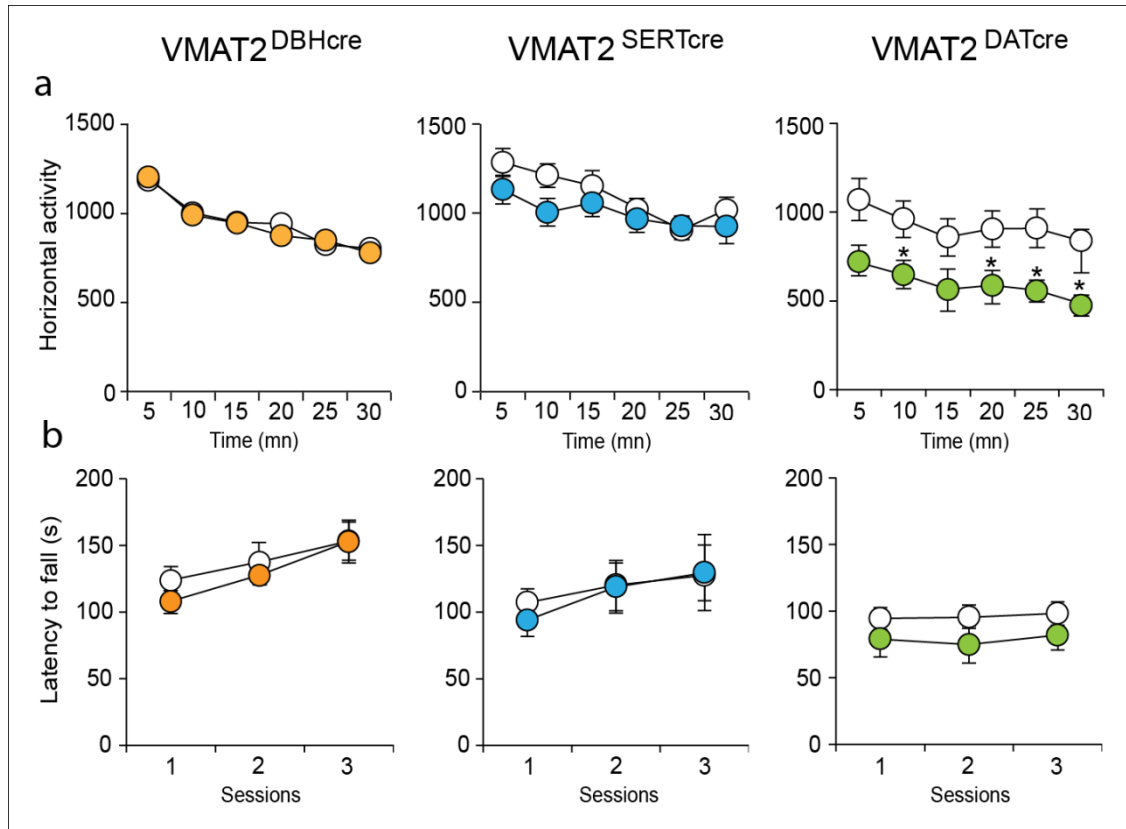

**Figure S1 : Motor functions.**

(a) Spontaneous locomotion over 30 minutes is decreased in the VMAT2<sup>DATcre</sup>-HET mice (right) compared to their WT littermates while a similar locomotor pattern between HET and WT is observed in the VMAT2<sup>DBHcre</sup> (left) and VMAT2<sup>SERTcre</sup> lines (middle). \*p<0.05 indicates a significant difference between WT and HET. (b) Motor coordination assessed during 3 consecutive sessions in a rotarod is unaltered in HET mice compared to their respective WT in the 3 mice lines.

**Appendix 1** to Isingrini E, Perret L, Rainer Q, et al. Selective genetic disruption of the dopaminergic, serotonergic and noradrenergic neurotransmission systems: insights on motor, emotional and addictive behaviour. *J Psychiatry Neurosci* 2015.

DOI: 10.1503/jpn.150028

Online appendices are unedited and posted as supplied by the authors.

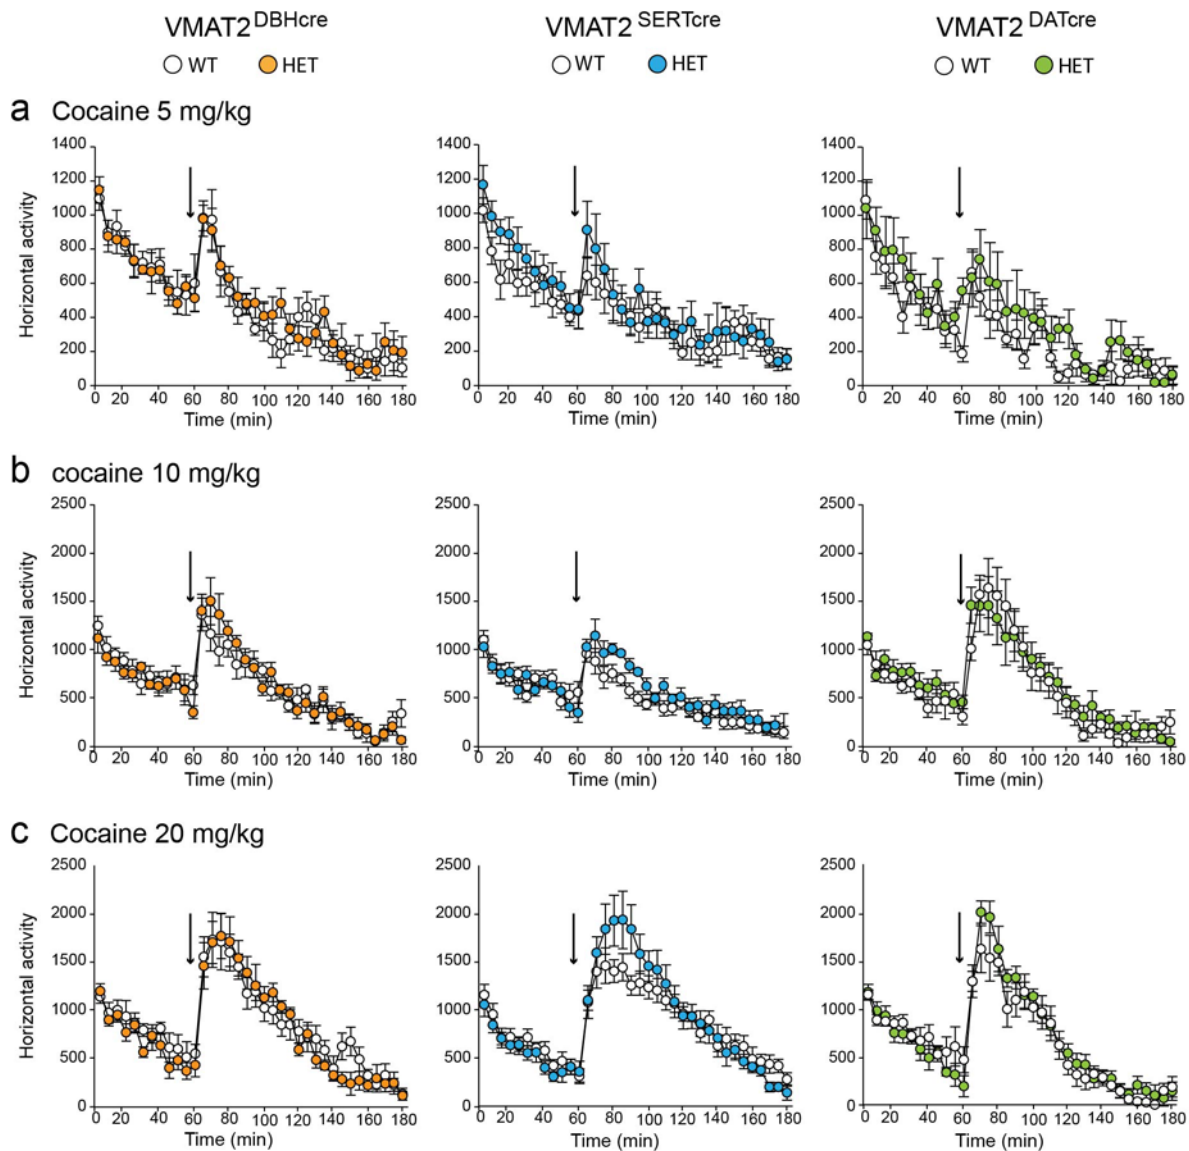

**Figure S2 : Acute locomotor response to cocaine according to time.**

Acute 2-hrs locomotor response to cocaine at concentration of (a) 5 mg/kg, (b) 10 mg/kg and (c) 20 mg/kg, after 1-hr habituation in WT and HET mice of the  $VMAT2^{DBHcre}$  (left),  $VMAT2^{SERTcre}$  (middle) and  $VMAT2^{DATcre}$  (right). The black arrow indicate the time of i.p. cocaine injection.

**Appendix 1** to Isingrini E, Perret L, Rainer Q, et al. Selective genetic disruption of the dopaminergic, serotonergic and noradrenergic neurotransmission systems: insights on motor, emotional and addictive behaviour. *J Psychiatry Neurosci* 2015.

DOI: 10.1503/jpn.150028

Online appendices are unedited and posted as supplied by the authors.

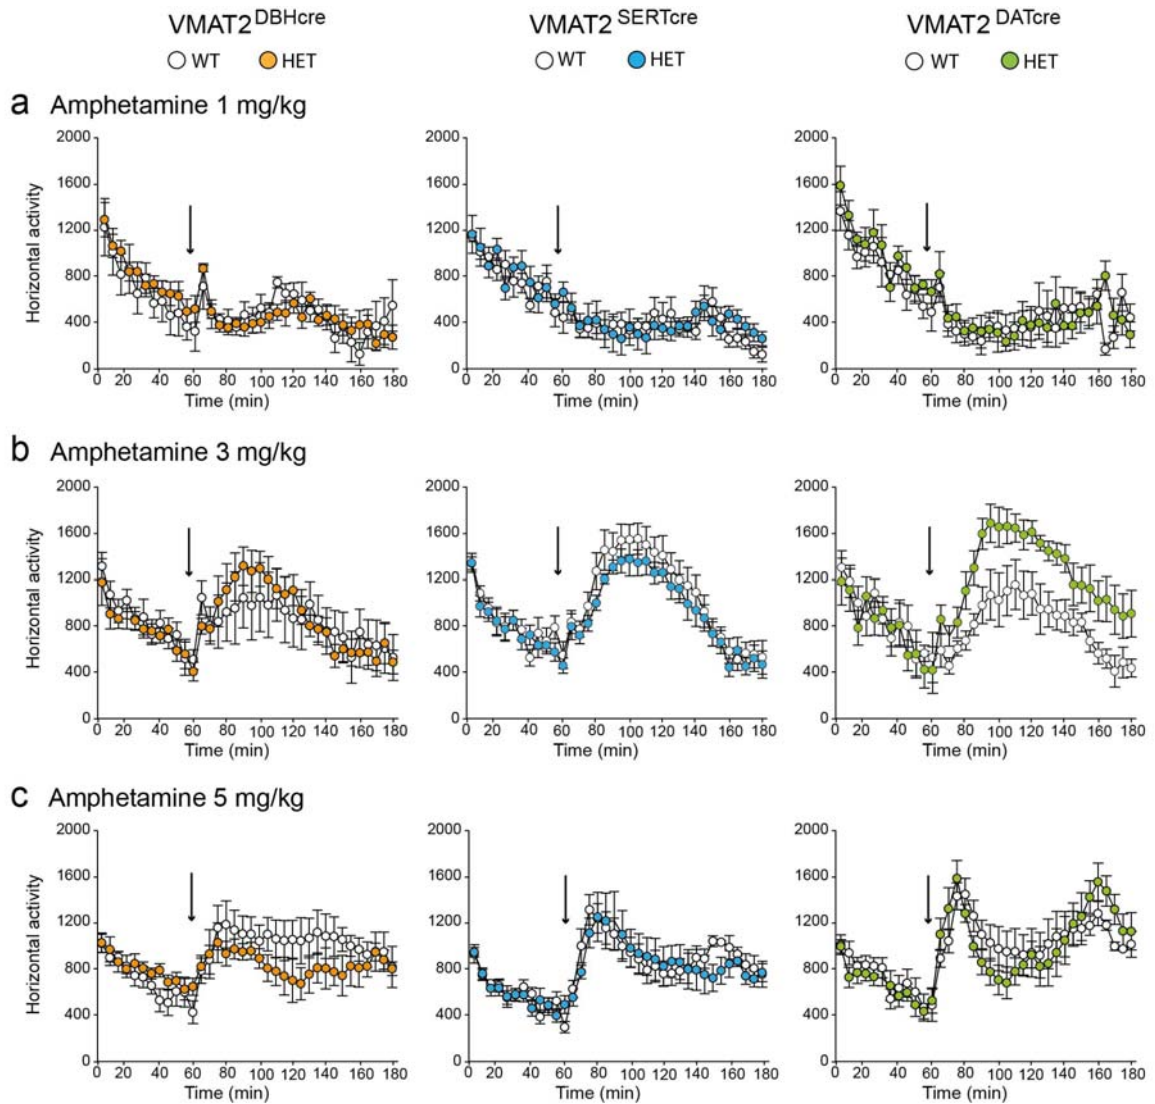

**Figure S3 : Acute locomotor response to amphetamine according to time.**

Acute 2-hrs locomotor response to amphetamine at concentration of (a) 1 mg/kg, (b) 3 mg/kg and (c) 5 mg/kg, after 1-hr habituation in WT and HET mice of the  $VMAT2^{DBHcre}$  (left),  $VMAT2^{SERTcre}$  (middle) and  $VMAT2^{DATcre}$  (right). The black arrow indicate the time of i.p. amphetamine injection.

**Appendix 1** to Isingrini E, Perret L, Rainer Q, et al. Selective genetic disruption of the dopaminergic, serotonergic and noradrenergic neurotransmission systems: insights on motor, emotional and addictive behaviour. *J Psychiatry Neurosci* 2015.

DOI: 10.1503/jpn.150028

*Online appendices are unedited and posted as supplied by the authors.*

**Table S1: Breeding strategy**

The heterozygote VMAT2 floxed mice crossed with heterozygote DBHcre, SERTcre and DATcre mice allowed obtaining double heterozygote mice which were crossed between them to generate: 3 genotypes WT, HET, KO.

|            | VMAT2 <sup>DBHcre</sup>                       | VMAT2 <sup>SERTcre</sup>                       | VMAT2 <sup>DATcre</sup>                       |
|------------|-----------------------------------------------|------------------------------------------------|-----------------------------------------------|
| <b>WT</b>  | VMAT2 <sup>+/+</sup> DBH <sup>cre/+</sup>     | VMAT2 <sup>+/+</sup> SERT <sup>cre/+</sup>     | VMAT2 <sup>+/+</sup> DAT <sup>cre/+</sup>     |
| <b>HET</b> | VMAT2 <sup>lox/+</sup> DBH <sup>cre/+</sup>   | VMAT2 <sup>lox/+</sup> SERT <sup>cre/+</sup>   | VMAT2 <sup>lox/+</sup> DAT <sup>cre/+</sup>   |
| <b>KO</b>  | VMAT2 <sup>lox/lox</sup> DBH <sup>cre/+</sup> | VMAT2 <sup>lox/lox</sup> SERT <sup>cre/+</sup> | VMAT2 <sup>lox/lox</sup> DAT <sup>cre/+</sup> |

Online appendices are unedited and posted as supplied by the authors.

**Table S2 : Detailed statistical analysis** (WT : Wild-type; HET : Heterozygote; KO : Knock-out; VMAT2 : Vesicular monoamine transporter 2; DBH : Dopamine  $\beta$ -hydroxylase; SERT : Serotonin transporter; DAT : Dopamine transporter; HPLC : High performance liquide chromatography; NE : Norepinephrine; 5HT : Serotonin; DA : Dopamine; EPM : Elevated plus maze; FST : Forced swim test; NSF : Novelty suppressed feeding test; CPP : Conditioned place preference).

| Figure    | test | Parameter                                     | Numbers                                                 | Statistical test     | Significance                            | Post-hoc test (group effect)                                                                |
|-----------|------|-----------------------------------------------|---------------------------------------------------------|----------------------|-----------------------------------------|---------------------------------------------------------------------------------------------|
| 1c left   | HPLC | Whole brain tissu content ( $\mu\text{g/g}$ ) | VMAT2 <sup>DBHcre</sup><br>WT n=5<br>HET n=5<br>KO n=6  | Kruskal-Wallis ANOVA | DA : H (2, 16) =1,135125 p =,5669       | WT vs KO : U=0 p=,006 (<,033)*<br>HET vs KO : U=0 p=,006 (<,033)*<br>WT vs HET : U=15 p=,75 |
|           |      |                                               |                                                         |                      | 5HT : H (2, 16) =,0397059 p =,9803      |                                                                                             |
| 1c middle | HPLC | Whole brain tissu content ( $\mu\text{g/g}$ ) | VMAT2 <sup>SERTcre</sup><br>WT n=5<br>HET n=5<br>KO n=5 | Kruskal-Wallis ANOVA | NE : H (2, 16) =10,62794 p =,0049       | WT vs KO : U=0 p=,009 (<,033)*<br>HET vs KO : U=0 p=,009 (<,033)*<br>WT vs HET : U=12 p=,92 |
|           |      |                                               |                                                         |                      | DOPAC : H (2, 16) =,4044118 p =,8169    |                                                                                             |
| 1c right  | HPLC | Whole brain tissu content ( $\mu\text{g/g}$ ) | VMAT2 <sup>DATcre</sup><br>WT n=8<br>HET n=5<br>KO n=3  | Kruskal-Wallis ANOVA | HVA : H (2, 16) =,2647059 p =,8760      | WT vs KO : U=0 p=,014 (<,033)*<br>HET vs KO : U=0 p=,025 (<,033)*<br>WT vs HET : U=15 p=,46 |
|           |      |                                               |                                                         |                      | HIAA : H (2, 16) =,5941176 p =,7430     |                                                                                             |
| 1d left   | HPLC | Ratio                                         | VMAT2 <sup>DBHcre</sup><br>WT n=5<br>HET n=5<br>KO n=6  | Kruskal-Wallis ANOVA | DA : H (2, 16) =7,240809 p =,0268       | WT vs KO : U=0 p=,006 (<,033)*<br>HET vs KO : U=0 p=,006 (<,033)*<br>WT vs HET : U=10 p=,60 |
|           |      |                                               |                                                         |                      | 5HT : H (2, 16) =1,763531 p =,4141      |                                                                                             |
| 1d middle | HPLC | Ratio                                         | VMAT2 <sup>SERTcre</sup><br>WT n=5                      | Kruskal-Wallis ANOVA | NE : H (2, 16) =2,057353 p =,3575       | WT vs KO : U=0 p=,006 (<,033)*<br>HET vs KO : U=0 p=,006 (<,033)*<br>WT vs HET : U=10 p=,60 |
|           |      |                                               |                                                         |                      | DOPAC : H (2, 16) =,2220588 p =,8949    |                                                                                             |
|           |      |                                               |                                                         |                      | HVA : H (2, 16) =,1632353 p =,9216      |                                                                                             |
|           |      |                                               |                                                         |                      | HIAA : H (2, 16) =,6455882 p =,7241     |                                                                                             |
|           |      |                                               |                                                         |                      | DOPAC/DA : H (2, 16) =2,451471 p =,2935 |                                                                                             |
|           |      |                                               |                                                         |                      | HVA/DA : H (2, 16) =,9338235 p =,6269   |                                                                                             |
|           |      |                                               |                                                         |                      | DOPAC/NE : H (2, 16) =10,69853 p =,0048 |                                                                                             |
|           |      |                                               |                                                         |                      | HIAA/5HT : H (2, 16) =1,392647 p =,4984 |                                                                                             |
|           |      |                                               |                                                         |                      | DOPAC/DA : H (2, 15) =0,000000 p =1,000 |                                                                                             |
|           |      |                                               |                                                         |                      | HVA/DA : H (2, 15) =4,580000 p =,1013   |                                                                                             |

**Appendix 1** to Isingrini E, Perret L, Rainer Q, et al. Selective genetic disruption of the dopaminergic, serotonergic and noradrenergic neurotransmission systems: insights on motor, emotional and addictive behaviour. *J Psychiatry Neurosci* 2015.

DOI: 10.1503/jpn.150028

Online appendices are unedited and posted as supplied by the authors.

|           |      |                          |                                                             |                      |                                                                                                                                                                        |                                                                                                                                                                                            |
|-----------|------|--------------------------|-------------------------------------------------------------|----------------------|------------------------------------------------------------------------------------------------------------------------------------------------------------------------|--------------------------------------------------------------------------------------------------------------------------------------------------------------------------------------------|
|           |      |                          | HET n=5<br>KO n=5                                           |                      | DOPAC/NE : H (2, 15) =2,060000 p =,3570<br>HIAA/5HT : H (2, 15) =9,980000 p =,0068                                                                                     | WT vs KO : U=0 p=,009 (<,033)*<br>HET vs KO : U=0 p=,009 (<,033)*<br>WT vs HET : U=7 p=,25                                                                                                 |
| 1d right  | HPLC | Ratio                    | VMAT2 <sup>DATcre</sup><br>WT n=8<br>HET n=5<br>KO n=3      | Kruskal-Wallis ANOVA | DOPAC/DA : H (2, 16) =6,896691 p =,0318<br>HVA/DA : H (2, 16) =7,240809 p =,0268<br>DOPAC/NE : H (2, 16) =1,682353 p =,4312<br>HIAA/5HT : H (2, 16) =5,470588 p =,0649 | WT vs KO : U=0 p=,014 (<,033)*<br>HET vs KO : U=0 p=,025 (<,033)*<br>WT vs HET : U=19 P=,88<br>WT vs KO : U=0 p=,014 (<,033)*<br>HET vs KO : U=0 p=,025 (<,033)*<br>WT vs HET : U=15 p=,46 |
| 2a left   | HPLC | NE concentration (µg/g)  | VMAT2 <sup>DBHcre</sup><br>WT n=3<br>HET n=4                | Mann-Whitney U Test  | LC : U=0 p=,034 (<,05)*                                                                                                                                                |                                                                                                                                                                                            |
| 2a middle | HPLC | 5HT concentration (µg/g) | VMAT2 <sup>SERTcre</sup><br>WT n=4<br>HET n=6               | Mann-Whitney U Test  | Raphe : U=3 p=,05 (<,05) *                                                                                                                                             |                                                                                                                                                                                            |
| 2a right  | HPLC | DA concentration (µg/g)  | VMAT2 <sup>DATcre</sup><br>WT n=9<br>HET n=11(VTA) / 10(SN) | Mann-Whitney U Test  | VTA : U=24 p=,05 (<,05)*<br>SN : U=10 p=,004 (<,05)**                                                                                                                  |                                                                                                                                                                                            |
| 3a left   | EPM  | Time (%)                 | VMAT2 <sup>DBHcre</sup><br>WT n=19<br>HET n=20              | Mann-Whitney U Test  | Open arms : U=172,5 p=,62<br>Closed arms : U=172 p=,67                                                                                                                 |                                                                                                                                                                                            |
| 3a middle | EPM  | Time (%)                 | VMAT2 <sup>SERTcre</sup><br>WT n=14<br>HET n=12             | Mann-Whitney U Test  | Open arms : U=61 p=,24<br>Closed arms : U=60,5 p=,23                                                                                                                   |                                                                                                                                                                                            |
| 3a right  | EPM  | Time (%)                 | VMAT2 <sup>DATcre</sup><br>WT n=9<br>HET n=9                | Mann-Whitney U Test  | Open arms : U=32,5 p=,48<br>Closed arms : U=33 p=,51                                                                                                                   |                                                                                                                                                                                            |
| 3b left   | NSF  | Eating latency (s)       | VMAT2 <sup>DBHcre</sup><br>WT n=10<br>HET n=10              | Mann-Whitney U Test  | U=43 p=,60                                                                                                                                                             |                                                                                                                                                                                            |
| 3b middle | NSF  | Eating latency (s)       | VMAT2 <sup>SERTcre</sup><br>WT n=8                          | Mann-Whitney U Test  | U=23,5 p=,95                                                                                                                                                           |                                                                                                                                                                                            |

**Appendix 1** to Isingrini E, Perret L, Rainer Q, et al. Selective genetic disruption of the dopaminergic, serotonergic and noradrenergic neurotransmission systems: insights on motor, emotional and addictive behaviour. *J Psychiatry Neurosci* 2015.

DOI: 10.1503/jpn.150028

Online appendices are unedited and posted as supplied by the authors.

|           |                                     |                            | HET n=6                                                     |                             |                                              |                                                                                  |
|-----------|-------------------------------------|----------------------------|-------------------------------------------------------------|-----------------------------|----------------------------------------------|----------------------------------------------------------------------------------|
| 3b right  | NSF                                 | Eating latency (s)         | VMAT2 <sup>DA1cre</sup><br>WT n=8<br>HET n=8                | Mann-Whitney U Test         |                                              | U=26,5 p=,56                                                                     |
| 3c left   | FST                                 | Immobility (%)             | VMAT2 <sup>DBHcre</sup><br>WT n=16<br>HET n=16              | Mann-Whitney U Test         |                                              | U=124 p=,88                                                                      |
| 3c middle | FST                                 | Immobility (%)             | VMAT2 <sup>SERTcre</sup><br>WT n=8<br>HET n=7               | Mann-Whitney U Test         |                                              | U=24 p=,64                                                                       |
| 3c right  | FST                                 | Immobility (%)             | VMAT2 <sup>DA1cre</sup><br>WT n=9<br>HET n=9                | Mann-Whitney U Test         |                                              | U=25,5 p=,18                                                                     |
| 3d left   | Sucrose preference test             | Sucrose preference (%)     | VMAT2 <sup>DBHcre</sup><br>WT n=10<br>HET n=9               | Mann-Whitney U Test         |                                              | U=40 p=,68                                                                       |
| 3d middle | Sucrose preference test             | Sucrose preference (%)     | VMAT2 <sup>SERTcre</sup><br>WT n=10<br>HET n=8              | Mann-Whitney U Test         |                                              | U=39 p=,93                                                                       |
| 3d right  | Sucrose preference test             | Sucrose preference (%)     | VMAT2 <sup>DA1cre</sup><br>WT n=10<br>HET n=10              | Mann-Whitney U Test         |                                              | U=39 p=,41                                                                       |
| 4a left   | Acute locomotor response to cocaine | 30-min horizontal activity | VMAT2 <sup>DBHcre</sup><br>WT n=6, 6, 6<br>HET n=6, 6, 6    | Kruskal-Wallis ANOVA        | H (5, 36) =21,19820 p =,0007                 | 5 mg/kg : U=16 p=,75<br>10 mg/kg : U=12 p=,34<br>20 mg/kg : U=13 p=,42           |
| 4a middle | Acute locomotor response to cocaine | 30-min horizontal activity | VMAT2 <sup>SERTcre</sup><br>WT n=7, 10, 10<br>HET n=8, 7, 9 | Kruskal-Wallis ANOVA        | H (5, 51) =30,97827 p =,0000                 | 5 mg/kg : U=23 p=,56<br>10 mg/kg : U=12 p=,024 (<,033)*<br>20 mg/kg : U=31 p=,25 |
| 4a right  | Acute locomotor response to cocaine | 30-min horizontal activity | VMAT2 <sup>DA1cre</sup><br>WT n=5, 6, 6<br>HET n=6, 6, 6    | Kruskal-Wallis ANOVA        | H (5, 35) =19,68698 p =,0014                 | 5 mg/kg : U=16 p=,75<br>10 mg/kg : U=12 p=,34<br>20 mg/kg : U=13 p=,42           |
| 4b left   | Cocaine sensitization (20 mg/kg)    | 30-min horizontal activity | VMAT2 <sup>DBHcre</sup><br>WT n=10                          | Wilcoxon Matched Pairs Test | Day 1 vs Day 8 :<br>WT : T=0 p=,005 (<,01)** |                                                                                  |



**Appendix 1** to Isingrini E, Perret L, Rainer Q, et al. Selective genetic disruption of the dopaminergic, serotonergic and noradrenergic neurotransmission systems: insights on motor, emotional and addictive behaviour. *J Psychiatry Neurosci* 2015.

DOI: 10.1503/jpn.150028

Online appendices are unedited and posted as supplied by the authors.

|           |                                         |                                                  |                                                            |                             |                                                                                                                                             |                                                                              |
|-----------|-----------------------------------------|--------------------------------------------------|------------------------------------------------------------|-----------------------------|---------------------------------------------------------------------------------------------------------------------------------------------|------------------------------------------------------------------------------|
|           |                                         |                                                  | HET n=10                                                   |                             | HET : T=8 p=,047 (<,05)*                                                                                                                    |                                                                              |
| 4b middle | Cocaine sensitization (20 mg/kg)        | 30-min horizontal activity                       | VMAT2 <sup>SERTcre</sup><br>WT n=9<br>HET n=8              | Wilcoxon Matched Pairs Test | Day 1 vs Day 8 :<br>WT : T=0 p=,008 (<,01)**<br>HET : T=11 p=,33                                                                            |                                                                              |
| 4b right  | Cocaine sensitization (20 mg/kg)        | 30-min horizontal activity                       | VMAT2 <sup>DATcre</sup><br>WT n=8<br>HET n=8               | Wilcoxon Matched Pairs Test | Day 1 vs Day 8 :<br>WT : T=0 p=,012 (<,05)*<br>HET : T=1 p=,017 (<,05)*                                                                     |                                                                              |
| 4c left   | Acute locomotor response to amphetamine | 2-hrs horizontal activity                        | VMAT2 <sup>DBHcre</sup><br>WT n=5, 6, 6<br>HET n=7, 7, 6   | Kruskal-Wallis ANOVA        | H (5, 37) =19,02934 p =,0019                                                                                                                | 1 mg/kg : U=14 p=,57<br>3 mg/kg : U=19 p=,77<br>5 mg/kg : U=11 p=,26         |
| 4c middle | Acute locomotor response to amphetamine | 2-hrs horizontal activity                        | VMAT2 <sup>SERTcre</sup><br>WT n=6,7,6<br>HET n=6,7,6      | Kruskal-Wallis ANOVA        | H (5, 38) =25,03355 p =,0001                                                                                                                | 1 mg/kg : U=17 p=,87<br>3 mg/kg : U=17 p=,34<br>5 mg/kg : U=16 p=,75         |
| 4c right  | Acute locomotor response to amphetamine | 2-hrs horizontal activity                        | VMAT2 <sup>DATcre</sup><br>WT n=5, 10, 6<br>HET n=5, 10, 6 | Kruskal-Wallis ANOVA        | H (5, 42) =28,63477 p =,0000                                                                                                                | 1 mg/kg : U=12 p=,92<br>3 mg/kg : U=13 p=,005 (<,033)*<br>5 mg/kg : U=18 p=1 |
| 4d left   | CPP                                     | Conditioned preference for drug-paired place (%) | VMAT2 <sup>DBHcre</sup><br>WT n=5, 6, 6<br>HET n=7, 7, 6   | Kruskal-Wallis ANOVA        | H (5, 41) =20,27383 p =,0011                                                                                                                | 0 mg/kg : U=21 p=1<br>1 mg/kg : U=21 p=,42<br>3 mg/kg : U=19 p=,89           |
| 4d middle | CPP                                     | Conditioned preference for drug-paired place (%) | VMAT2 <sup>SERTcre</sup><br>WT n=5, 8, 8<br>HET n=6, 8, 8  | Kruskal-Wallis ANOVA        | H (5, 43) =23,49545 p =,0003                                                                                                                | 0 mg/kg : U=13 p=,71<br>1 mg/kg : U=30 p=,83<br>3 mg/kg : U=31 p=,92         |
| 4d right  | CPP                                     | Conditioned preference for drug-paired place (%) | VMAT2 <sup>DATcre</sup><br>WT n=5, 5, 5<br>HET n=5, 6, 7   | Kruskal-Wallis ANOVA        | H (5, 32) =23,13563 p =,0003                                                                                                                | 0 mg/kg : U=11 p=,75<br>1 mg/kg : U=16 p=,81<br>3 mg/kg : U=8 p=,39          |
| S1 left   | Spontaneous locomotion                  | 30-min horizontal activity                       | VMAT2 <sup>DBHcre</sup><br>WT n=40<br>HET n=45             | Mann-Whitney U Test         | 5 min : U=866 p=,76<br>10 min : U=884 p=,89<br>15 min : U=900 p=1<br>20 min : U=745 p=,17<br>25 min : U=829,5 p=,53<br>30 min : U=844 p=,62 |                                                                              |
| S1 middle | Spontaneous locomotion                  | 30-min horizontal activity                       | VMAT2 <sup>SERTcre</sup><br>WT n=8<br>HET n=8              | Mann-Whitney U Test         | 5 min : U=19 p=,17<br>10 min : U=14 p=,06<br>15 min : U=24 p=,40                                                                            |                                                                              |

**Appendix 1** to Isingrini E, Perret L, Rainer Q, et al. Selective genetic disruption of the dopaminergic, serotonergic and noradrenergic neurotransmission systems: insights on motor, emotional and addictive behaviour. *J Psychiatry Neurosci* 2015.

DOI: 10.1503/jpn.150028

*Online appendices are unedited and posted as supplied by the authors.*

|             |                           |                               |                                              |                        |                                                                                                                                                                            |
|-------------|---------------------------|-------------------------------|----------------------------------------------|------------------------|----------------------------------------------------------------------------------------------------------------------------------------------------------------------------|
|             |                           |                               |                                              |                        | 20 min : U=25 p=,46<br>25 min : U=32 p=1<br>30 min : U=30 p=,83                                                                                                            |
| S1<br>right | Spontaneous<br>locomotion | 30-min horizontal<br>activity | VMAT2 <sup>DATcre</sup><br>WT n=8<br>HET n=9 | Mann-Whitney U<br>Test | 5 min : U=17 p=,067<br>10 min : U=14 p=,034 (<,05)*<br>15 min : U=20 p=,12<br>20 min : U=15 p=,043 (<,05)*<br>25 min : U=12 p=,021 (<,05)*<br>30 min : U=13 p=,027 (<,05)* |
